# Supplementary material for: Green synthesis of silver nanoclusters supported on carbon nanodots: enhanced photoluminescence and high catalytic activity for oxygen reduction reaction
Source: Royal Society of Chemistry journal article supplement (doi:10.1039/c3nr04054b), 2013-01-01
Supplement: c3nr04054b.pdf [file c3nr04054b.pdf]

Electronic Supplementary Information

**Green Synthesis of Silver Nanoclusters Supported on Carbon Nanodots:  
Enhanced Photoluminescence and High Catalytic Activity for Oxygen  
Reduction**

Minmin Liu,<sup>a,b</sup> and Wei Chen<sup>\*a</sup>

*<sup>a</sup>State Key Laboratory of Electroanalytical Chemistry, Changchun institute of Applied  
Chemistry, Chinese Academy of Sciences, Changchun 130022, Jilin, China, and*

*<sup>b</sup>University of Chinese Academy of Sciences, Beijing 100039, China*

E-mail: [weichen@ciac.ac.cn](mailto:weichen@ciac.ac.cn)

## Supplementary Results

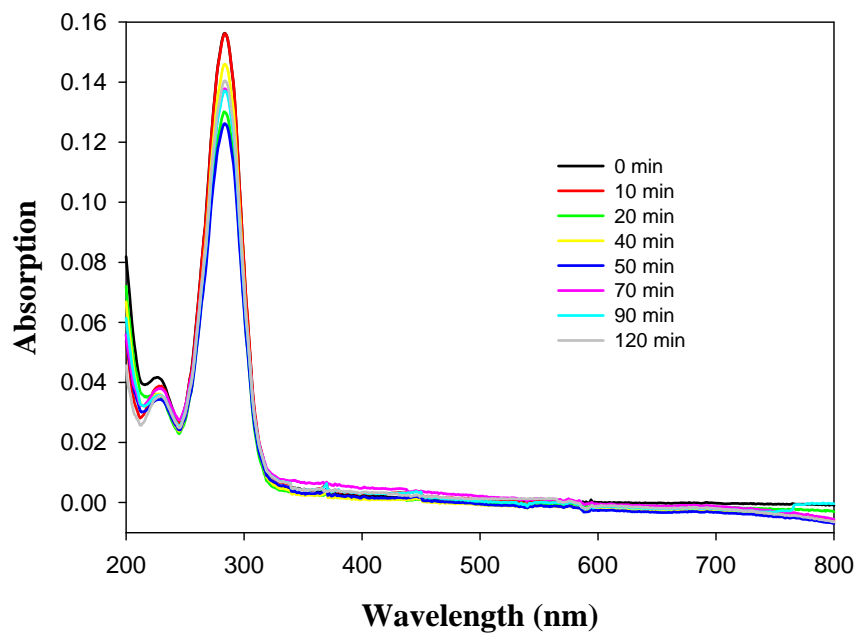

**Fig. S1** UV-Vis absorption spectra of carbon nanodots after refluxed for different times.

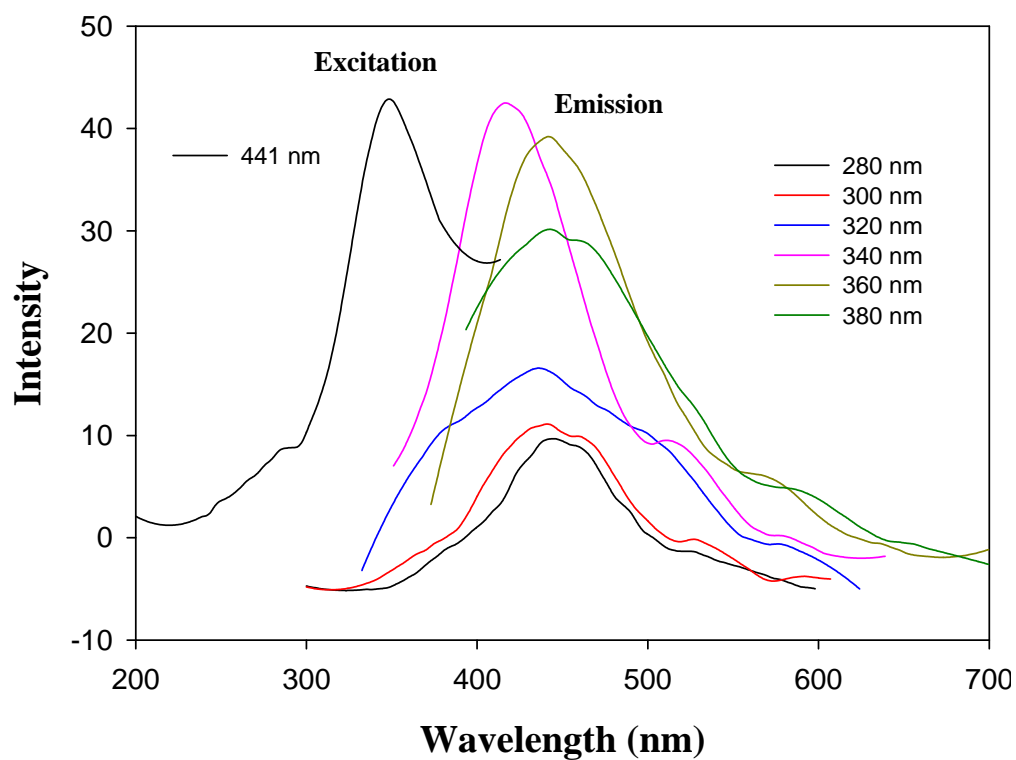

**Fig. S2** Excitation (left, Em: 441 nm) and emission spectra (right, excited at different wavelength) of the as-synthesized carbon nanodots.

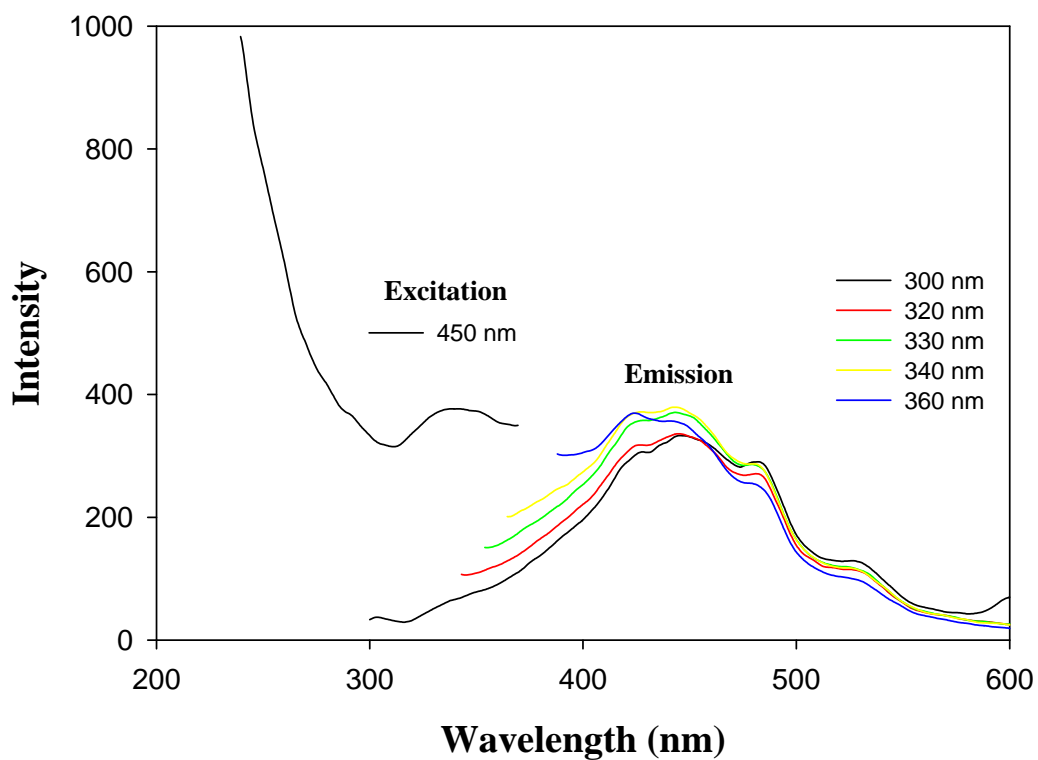

**Fig. S3** Excitation (left, Em: 450 nm) and emission spectra (right, excited at different wavelength) of the Ag NCs/CNs.

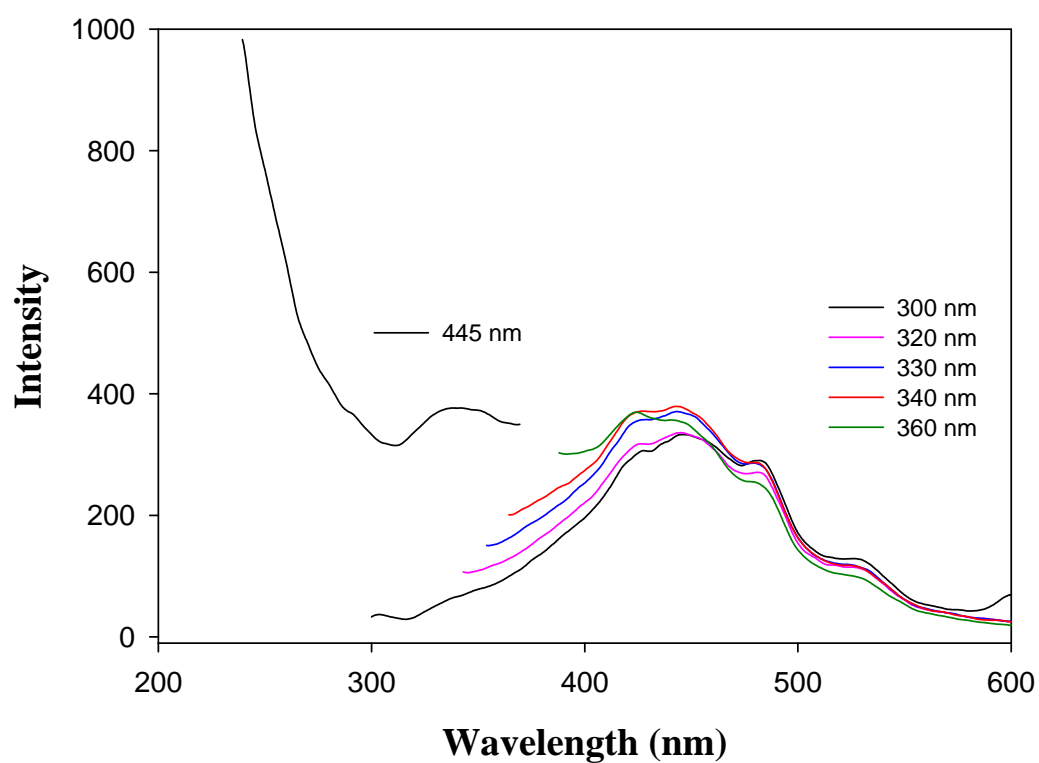

**Fig. S4** Excitation (left, Em: 445 nm) and emission spectra (right, excited at different wavelength) of the Ag NCs/CNs-25.

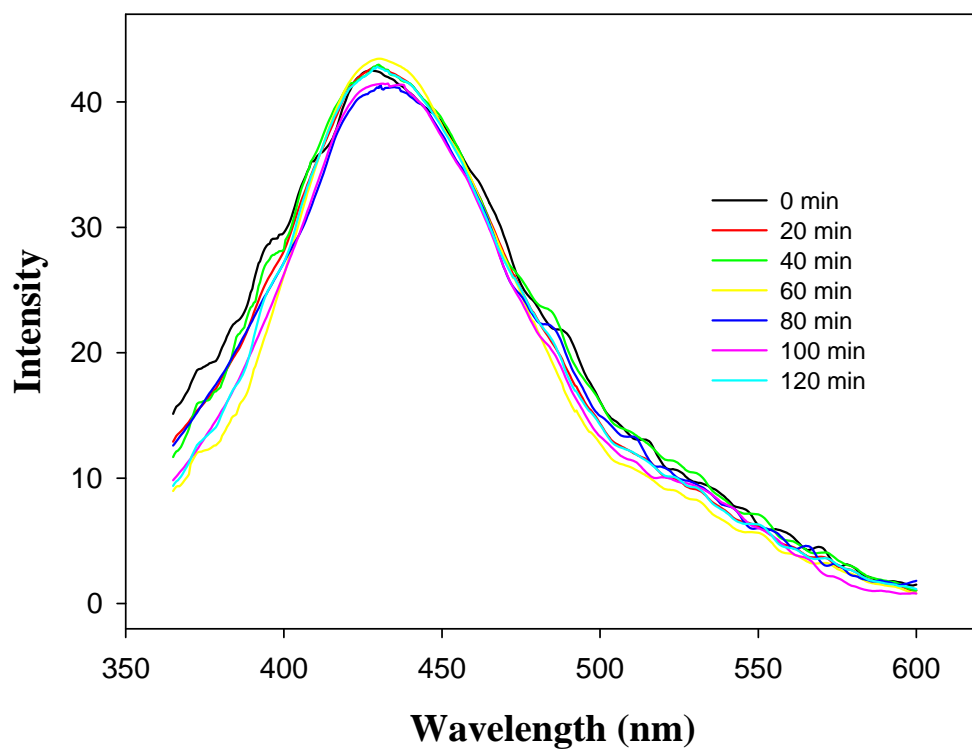

**Fig. S5** Emission spectra (excited at 340 nm) of the as-synthesized carbon nanodots with refluxing treatments for different times.

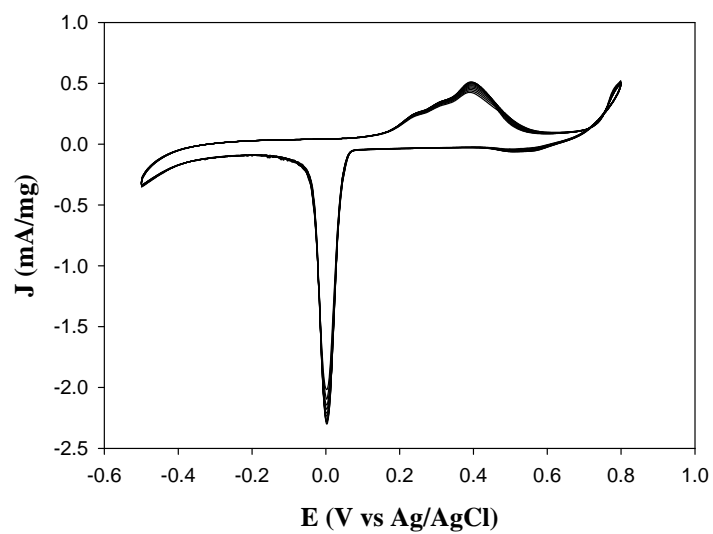

**Fig. S6** CVs of Ag NCs/CNs electrodes in  $N_2$ -saturated 0.1 M KOH solution (30 cycles).

Potential scan rate: 0.1 V/s.

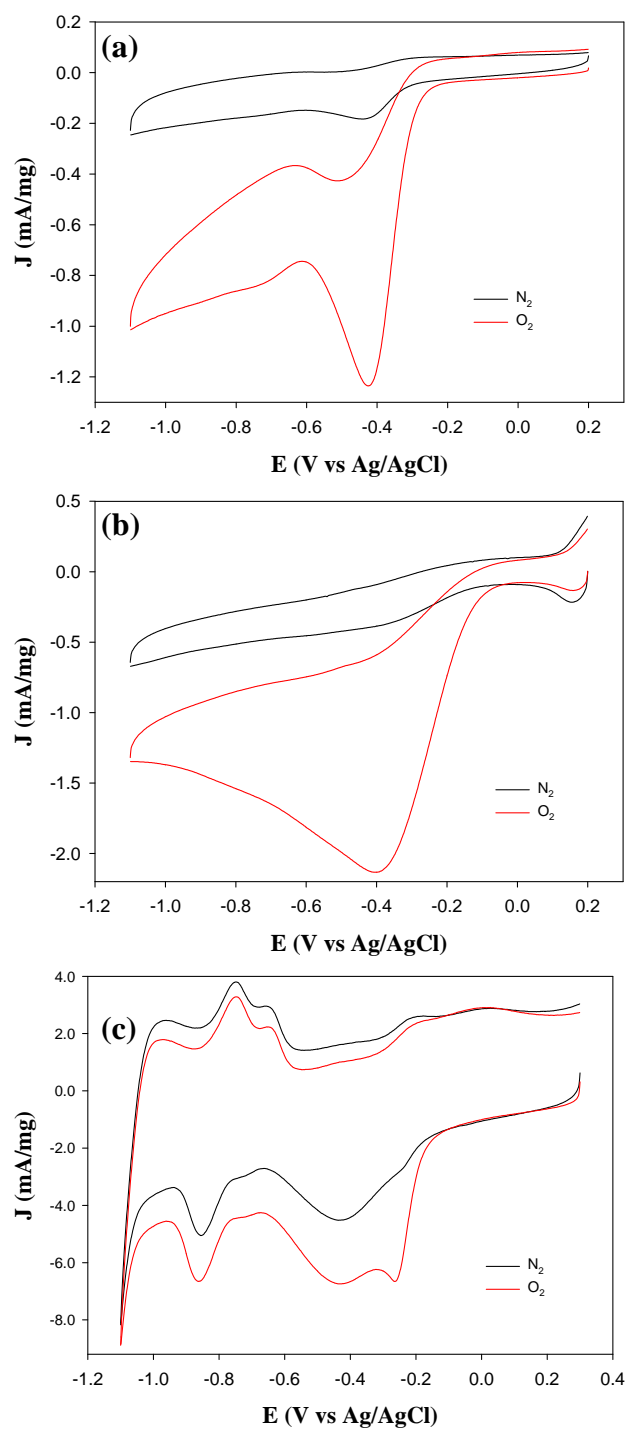

**Fig. S7** CVs of the carbon nanodots (CNs, a), Ag NCs/CNs-25 (b) and Pt/C (c) electrodes in  $N_2$  (black curve)- and  $O_2$  (red curve)-saturated 0.1 M KOH solution. Potential scan rate: 0.1 V/s.



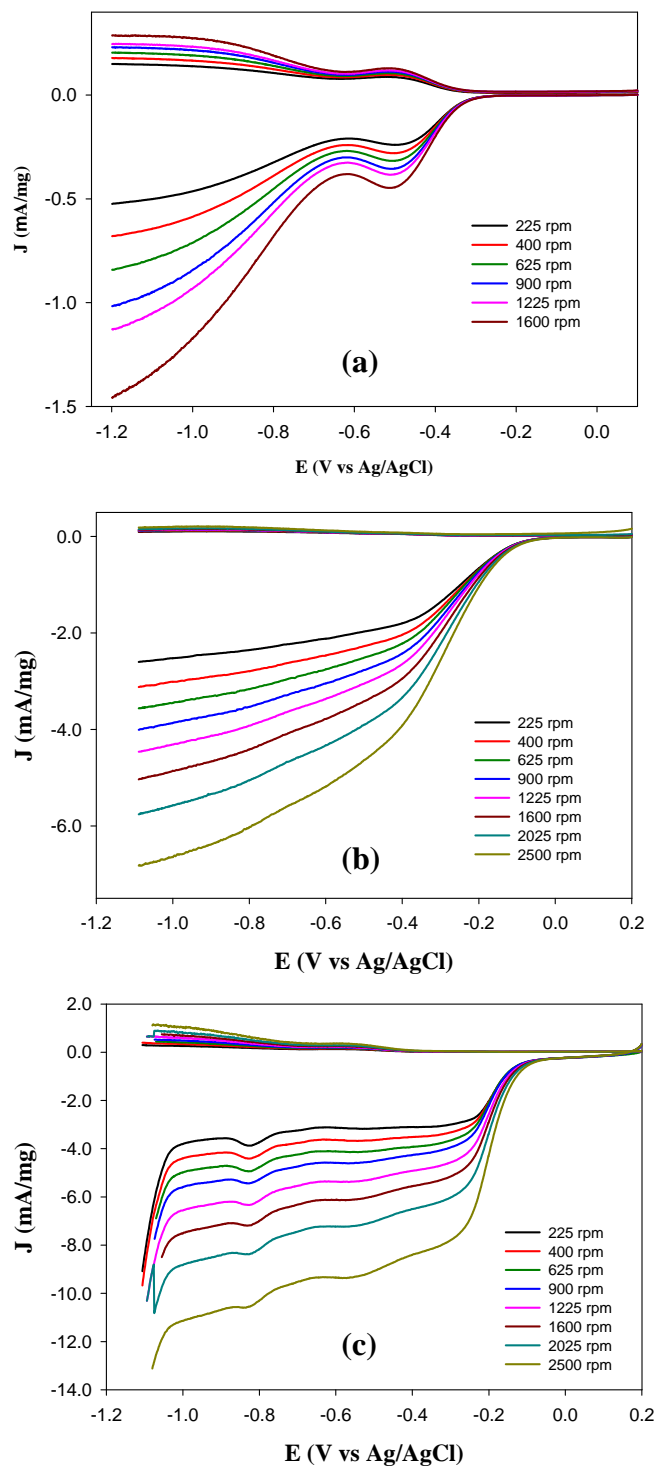

**Fig. S8** Rotation ring-disk voltammograms of ORR in  $O_2$ -saturated 0.1 M KOH solution at various rotation rates recorded on (a) carbon nanodots (CNs); (b) Ag NCs/CNs-25 and (c) Pt/C. Potential scan rate: 20 mV/s.
